# 1 Engineering a Universal Dengue Virus Vaccine using a Virus-Like Particle Scaffold

2  
3 Danielle A. Basore<sup>1,3</sup>, Carolyn M. Barcellona<sup>2</sup>, Thomas B. Jordan<sup>1,5</sup>, Donna E. Crone<sup>1</sup>, Sharon Isern<sup>2,4</sup>,  
4 Scott F. Michael<sup>2</sup>, Christopher Bystroff<sup>1</sup>

5  
6 <sup>1</sup>Biological Sciences, Rensselaer Polytechnic Institute, Troy, NY, USA, <sup>2</sup>Biological Sciences, Florida  
7 Gulf Coast University, Fort Myers, FL, USA, <sup>3</sup>Mercy College, Dobbs Ferry, NY, USA. <sup>4</sup>Center for  
8 Scientific Review, National Institutes of Health, Bethesda, MD USA. <sup>5</sup>Charles River Labs, Wilmington  
9 MA, USA.

## 10 11 Abstract

12 The fusion loop (FL), a 51-residue segment of the dengue virus (DENV) envelope (E) protein, has been  
13 shown to bind antibodies that neutralize DENV infection in cell culture. Vaccination with this loop could  
14 raise broadly neutralizing antibodies and avoid antibody dependent enhancement in second serotype  
15 infections associated with whole virus vaccination. We propose a new DENV vaccine in which FL has been  
16 genetically fused to a well-known and highly immunogenic carrier, the human papillomavirus (HPV) L1  
17 protein (L1). Chimeric L1-FL was expressed in human cell culture, but expression levels of virus-like  
18 particles (VLP) were initially low. Expression levels were improved after adding a bridging disulfide bond  
19 at the base of the loop, and were further improved by transfecting cells with a mixture of 9 parts chimera  
20 to 1 part wild-type L1 expression vectors. VLPs formed from the chimeric construct were purified using  
21 ultracentrifugation and were shown to form hollow particles of the expected size using transmission  
22 electron microscopy. The improvements in expression are discussed in the context of a theoretical pathway  
23 for folding and assembly of VLPs.

## 24 25 1 | INTRODUCTION

26 Viruses affect all domains of life, and so many organisms have evolved mechanisms to detect and respond  
27 to viral capsids<sup>1-3</sup>. In vertebrates these mechanisms, including activation of toll-like receptor 4<sup>4</sup>, size  
28 selective entrance into the germinal centers of the lymph nodes<sup>5</sup>, and recognition of the highly multivalent  
29 structure that enhances avidity to the maturing B-cells<sup>6</sup>, all make viral capsids efficient immunogens.

30 Human papilloma virus (HPV) L1 protein self-assembles into highly stable T=7 icosahedral 55 nm  
31 VLPs, identical in structure to the natural HPV capsid<sup>7,8</sup>. The VLPs each consist of 360 copies of L1,  
32 arranged in 72 pentamers, called capsomeres, which contain no other DNA or protein and are stabilized by  
33 multiple internal and inter-unit disulfide bonds. Because HPV infection is associated with the development  
34 of certain cancers, L1 VLPs are widely used as anti-cervical cancer vaccines<sup>9</sup>.

35 L1 can fold and form VLPs despite mutations in certain surface exposed loops. Specifically, up to  
36 39 residues of HPV L2 protein have been inserted at position 137 (DE loop) in L1 of HPV Type 16, without  
37 disrupting VLP formation or stability<sup>10</sup>. The HPV L1 monomer has a greek key or jelly roll fold, with a  
38 well-studied, theoretical folding pathway that provides guidance when considering the effect on folding of  
39 inserted antigenic loops<sup>11-14</sup>. One loop in particular, called the DE loop is predicted to fold late in the  
40 monomeric folding pathway, explaining the tolerance for insertions at this location<sup>15</sup>. The ability to  
41 genetically insert peptide antigens into HPV L1 VLPs provides an opportunity to use the immunogenicity  
42 of VLPs to create multifunctional vaccines and focus immunity toward neutralizing epitopes by inserting  
43 specific sequences into L1<sup>16</sup>.

44 DENV is a tropical virus spread primarily by two mosquito vectors, *Aedes aegypti* and *Aedes*  
45 *albopictus*. Climate change and globalization have spread the vectors, and therefore the virus, whose  
46 clinical manifestations range from mild flu-like symptoms, rash, and joint pain, to dengue hemorrhagic  
47 fever (DHF) or dengue shock syndrome (DSS). Exposure to any one of DENV's four known serotypes  
48 does not provide cross-protective immunity to the other three. On the contrary, infection with a second  
49 serotype can result in the very severe conditions DHF and DSS through the process of antibody dependent  
50 enhancement (ADE) of infection, a phenomenon that occurs when antibodies from the first infection bind

51 weakly to the viral particles of the second serotype, and target the still infectious viral particle to  
52 macrophages and other Fc receptor-bearing cells that are normally not infected<sup>17</sup>. A global estimate from  
53 the WHO estimates 390 million DENV infections, half a million hospitalizations and approximately 12,500  
54 deaths annually, making dengue one of the most prevalent vector-borne diseases in the world<sup>18</sup>. While  
55 there is a tetravalent vaccine available for dengue, it uses the full-length DENV envelope (E) surface protein  
56 and elicits an enhancing antibody response that can result in more severe outcomes in naïve recipients when  
57 they are exposed to DENV<sup>19</sup>. Consequently, use of this vaccine has been discontinued in many countries  
58 or is only licensed for use in people older than nine who have already experienced one or more DENV  
59 infections. The development of a safer dengue vaccine that does not induce enhanced disease is a high  
60 priority.

61 A subunit vaccine that focuses immunity specifically against neutralizing epitopes of DENV may  
62 avoid vaccine-induced ADE. A broadly neutralizing epitope has been identified by localizing the binding  
63 sites of broadly neutralizing monoclonal antibodies derived from patients post-DENV infection<sup>20</sup>. These  
64 antibodies blocked the fusion of the virus with the endosomal membrane within the infected cell, severing  
65 the life cycle of the virus<sup>21</sup>. The antibody binding is conformationally dependent and negatively affected by  
66 mutations within the neutralizing epitope, confirming that the neutralizing antibodies bound to that site.  
67 The neutralizing epitope encompasses the part of domain II of the envelope (E) protein of DENV, referred  
68 to as the fusion loop (FL), which is highly conserved. During infection, the DENV E protein undergoes a  
69 dramatic conformational change upon exposure to low pH, visible in TEM images<sup>22</sup>, producing a trimeric  
70 spike that exposes the hydrophobic FL and triggers fusion between the viral and endosomal membranes<sup>20</sup>.  
71 However, designing such a subunit vaccine is not trivial. Here we demonstrate proof of principle of the  
72 protein design elements of a hypothetical vaccine candidate by inserting the DENV FL into an exposed  
73 loop of HPV L1, creating a chimeric VLP containing parts from two antigenic proteins from different  
74 viruses. Considerable further work would be required to ascertain if these VLPs could induce a useful  
75 immune response.

## 77 **2 | RESULTS**

### 78 **2.1 | Design of constructs**

79 Two different chimeric proteins were designed and produced. In both, two adjacent HPV L1 residues,  
80 A137 and N138 in the DE loop were removed to create space and replaced with DENV E protein residues.  
81 In the initial chimera (designated FL), the DENV FL insert consisted of a 55 amino acid consensus from  
82 the four serotypes of DENV, flanked on each side with a glycine residue to allow flexibility. The second  
83 chimera was designed by modeling experiments using the crystal structures of HPV 16 L1 (PDB id 2R5H)  
84 and DENV serotype 2 E protein (PDBid 1OAN, Accession AHB63923). This approach resulted in the  
85 insertion of 51 amino acids from DENV serotype 2 E protein, flanked by upstream CGP and downstream  
86 GPC motifs, creating a new potential disulfide at the base of the DENV E insert. This second chimera was  
87 designated cysFL to reflect the design of the cysteine disulfide at the base of the DENV E insert. CGP/GPC  
88 linkers have been used to stabilize the display of short peptides on the surface of the enzyme thioredoxin  
89 on the surface of bacteria for the purpose of high throughput screening<sup>23</sup>. By adding CGP/GPC to the  
90 interface between the L1 and the FL insert, we encourage the formation of a disulfide bond that produces  
91 topological isolation (i.e., “pinching” off) of the FL insert. This decreases the effect of the additional loop  
92 entropy and encourages the proper folding of both the L1 monomer and FL insert<sup>24</sup>. The pair of flexible  
93 Gly-Pro dipeptides is believed to isolate, to some extent, the folding of the FL from the folding of L1,  
94 making both more efficient. Amino acid sequences of both chimeras and a model for the resulting structure  
95 are shown in Figure 1.

### 96 **2.2 | Expression of recombinant proteins**

97 The expression of the constructs was confirmed by Western blot analysis of equal amounts of the denatured  
98 cell lysates of each transfection probed with CAMVIR-1 anti-HPV L1 Ab (Figure 2). The wild type L1  
99 band can be seen at approximately 55 kDa. The chimeric L1 bands, L1-FL or L1-cysFL, are slightly higher  
100 at approximately 61 kDa, because of the inserts. L1-FL expression was only one tenth of the level of L1-  
101 WT, indicating that this chimera is less stable than the WT L1 protein. The expression of the CGP/GPC FL

102 construct, L1-cysFL, was approximately 3-fold higher than for L1-FL, indicating that this chimera showed  
103 increased stability compared to the initial L1-FL construct, but was still somewhat less stable than WT.

104

### 105 **2.3 | Confirmation of L1-FL expression in the cytoplasm**

106 Images of transfected 293TT cells provide visual confirmation of expression of GFP in green (Figure 5).  
107 Red fluorescence shows L1 protein expression bound to CAMVIR-1 anti-HPV L1 antibody. Overlapping  
108 fluorescence (orange) indicates that both GFP and L1 proteins are expressed in the same cell, although this  
109 does not always occur because the plasmid has separate promoters. Peri-nuclear L1 fluorescence shows that  
110 the L1 protein remains in the cells and not in the supernatant. Binding was not observed with the  
111 conformationally sensitive anti-FL monoclonal antibody 1.6D<sup>20</sup> with either the L1-FL or L1-cysFL  
112 constructs, possibly due to the chimeric FL not being folded correctly in the cytoplasm because the disulfide  
113 bonds have not yet formed.

### 114 **2.4 | Characterization of assembled VLPs by ultracentrifugation**

115 Rate zonal ultracentrifugation conditions were selected to discriminate between unassembled, assembled  
116 and aggregated L1 proteins in equal amounts of cell lysates. Following centrifugation, nine equal volume  
117 fractions were collected from the bottom to the top of the centrifuge tube and assayed by Western blot.  
118 VLPs appear in the middle fractions (2-8), while fraction 1 consists of aggregates that sediment to the  
119 bottom of the tube and fraction 9 is unassembled monomers or capsomeres that do not enter the gradient.  
120 Results of these experiments are shown in Figure 3. Wild type HPV L1 (L1-WT) VLPs sediment to fractions  
121 4 - 6, suggesting that they form uniformly sized particles. L1-FL enters the gradient but appears in equally  
122 low quantity in all fractions with no discernable peak, indicating that assembly of these particles is reduced  
123 and is not uniform. L1-cysFL VLPs express and assemble better overall than the uncrosslinked counterpart  
124 and sediment mostly to fractions 6 and 7, corresponding to a uniform but less dense VLP than the wild type,  
125 likely due to the increased hydrodynamic diameter of the particles with the addition of the inserted FL.

126 Additional transfection experiments were performed to investigate if co-expression of a small  
127 amount (1:9) of WT L1 could rescue the expression and assembly of the chimeric L1-FL and L1-cysFL  
128 proteins. Western blot analysis showed that expression and VLP formation are improved for both L1-FL  
129 and L1-cysFL in the presence of WT L1. Interestingly, the ratio of L1-FL to L1-WT in these middle  
130 fractions is approximately 1:1, even though 9:1 of plasmid was transfected, indicating that even in the  
131 presence of WT L1, L1-FL has reduced stability and may be degraded or aggregate. Co-expression of WT  
132 L1 appears to stabilize and promote assembly of the L1-cysFL VLPs to near WT levels.

### 133 **2.5 | Analysis of VLPs by transmission electron microscopy**

134 Wild type HPV 16 particles produced by expression of L1 in HEK 293TT cells and purified by  
135 ultracentrifugation are visible with uranyl acetate staining (Figure 4). They are roughly spherical and  
136 approximately 55nm across, indicating properly folded protein and assembled particles. Additionally,  
137 purchased HPV 18 L1 particles also appear similar to HPV 16 L1 VLPs. The chimeric L1-cysFL samples  
138 display hollow 55 nm spheres but without clear capsomere segmentation. We speculate that the FLs, being  
139 much larger than the native DE loop, obscure the capsomere boundaries. We were not able to observe VLPs  
140 of the L1-FL chimera by TEM.

### 141 **2.6 | Confirmation of correctly folded and accessible DENV FL in VLPs**

142 An ELISA was used to probe chimeric, assembled VLPs for correctly folded DENV FL (Figure 6). High  
143 bind 96 well plates were coated with VLPs and probed with a conformationally-sensitive human anti-  
144 DENV FL Ab (1.6D), followed by goat anti-human IgG HRP. Increasing concentrations of hMAb 1.6D  
145 bind specifically to L1-cysFL VLPs in a dose-dependent manner, but not to WT VLPs. This indicates that  
146 the FL in chimeric L1-cysFL VLPs is properly folded, exposed, and accessible to an anti-DENV FL  
147 antibody when bracketed by the CGP/GPC motif.

148

## 149 **3 | DISCUSSION AND CONCLUSIONS**

150 The challenge in expressing a chimeric VLP is that success depends on spontaneous protein self-  
151 organization at multiple distinct levels, capsid monomer folding, pentamer (capsomere) formation from  
152 monomers, formation of the super-quaternary structure of the icosahedral particle from capsomeres and

153 folding of the insert, any of which may be disrupted by the fusion of the different viral proteins. Our initial  
154 attempt utilizing a DENV FL sequence flanked by glycines (L1-FL) did not express at high levels and did  
155 not assemble efficiently into VLPs. An inserted loop could produce this result via two likely mechanisms-  
156 entropic effects in folding or steric effects in oligomerization. An entropic barrier to folding may have been  
157 introduced when the DENV FL was inserted into the L1 DE loop, increasing the contact order<sup>25</sup> of that loop  
158 and possibly slowing its folding. The results are consistent with a FL whose folding is controlled by free  
159 energy and which, because of its smaller size, folds much faster than L1. We pursued two different  
160 strategies to overcome this limitation: redesign of the FL insert site and coexpression with a small amount  
161 of WT L1. Both strategies were successful in stabilizing the chimeric protein and improving assembly of  
162 chimeric VLPs.

163 As viral structural proteins, HPV L1 and DENV FL are both heavily disulfide crosslinked for  
164 stability. We reasoned that the presence of an additional disulfide at the base of the FL insertion site might  
165 effectively lock the FL in its folded state and separate it's folding from L1. We propose that the designed  
166 covalent crosslink in L1-cysFT returns the L1 DE loop conformational entropy to its approximate wild-  
167 type value, allowing L1 to fold at its native rate or at a more native-like rate. Molecular modeling did not  
168 show steric interference between FL and L1, despite the 51-residue size of the FL in the L1-cysFL construct.  
169 Experimental results showed that bracketing the FL insert with a disulfide containing CGP/GPC motif  
170 improved expression and VLP assembly.

171 Coexpression of defective monomers can often poison the structure and function of multimeric  
172 proteins (the dominant negative effect). Conversely, coexpression of functional monomers of a multimer  
173 can often rescue partially defective monomers. We used this reasoning and coexpressed a small amount of  
174 WT L1 along with each of the chimeric constructs. We hypothesized that these wild type monomers would  
175 relieve steric stress and encourage proper folding and assembly of VLPs. Molecular dynamics simulations  
176 done as a supplement to this work seems to suggest that this is the case, with one wild type monomer being  
177 included per pentamer, and allowing particle assembly to proceed (see supplemental information). VLP  
178 assembly of both of the chimeras was improved by coexpression with WT L1, which preferentially  
179 coassembled into the VLPs in a ratio higher than the ratio of coexpression. The migration of these mixed  
180 VLPs during rate zonal ultracentrifugation was shifted towards the bottom of the gradient, similar to WT  
181 VLPs, probably due to the particles having fewer monomeric units with a FL insert.

182 The chimeric HPV L1/DENV FL proteins described here self-assemble into VLPs that are  
183 potentially attractive multi-pathogen vaccine candidates. For DENV in particular, the focus on a broadly  
184 neutralizing epitope may help to solve the problem with ADE faced by current vaccines. We also show  
185 two different methods that are useful for stabilizing expression and assembly of chimeric proteins: Design  
186 of flanking sequences that can form a disulfide bond to isolate the inserted sequence from the host protein  
187 was shown to improve VLP formation. Coexpression with WT L1 resulted in formation of higher levels  
188 of mixed VLPs that still contained chimeric monomers. This work extends the successful combination of  
189 vaccines, such as the MMR and DTaP, in an effort to produce vaccines that can be provided at lower cost  
190 to generate coverage against multiple pathogens in a single dose.

191

## 192 **4 | MATERIALS AND METHODS**

### 193 **4.1 | Design of constructs**

194 Multiple HPV-L1 sequence alignments were carried out in UGENE<sup>26</sup> using MUSCLE<sup>27</sup>. Structures were  
195 inspected and homology models were constructed using MOE (Molecular Operating Environment, CCG,  
196 Montreal). Manual docking was used to position the FL (PDBid 1OAN residues 67-117) in relation to a  
197 model of the HPV-L1 capsomere (PDBid 2R5K), followed by loop building using MOE's Loop Modeler  
198 function and local energy minimization. The flanking sequences CGP/GPC were added in such a way that  
199 the two cysteines were within 6Å and could form a disulfide bond. Genes for all designed constructs were  
200 made by Genscript (New Jersey), using the p16L1-GFP plasmid which co-expresses HPV type 16 L1 and  
201 GFP<sup>28</sup>.

### 202 **4.2 | Cell culture and transfection**

203 Human embryonic kidney HEK 293TT cells (ATTC, Manassas, VA) were cultured in Dulbecco's Modified  
204 Eagle Medium (DMEM) supplemented with 10% (v/v) FBS, 2 mM Glutamax, 100 U/mL penicillin G, 100  
205  $\mu\text{g}/\text{mL}$  streptomycin, 0.25  $\mu\text{g}/\text{mL}$  amphotericin B, and 250  $\mu\text{g}/\text{mL}$  hygromycin B at 37°C with 5% (v/v)  
206  $\text{CO}_2$ . Cells were transfected in serum free DMEM using Mirus TransIT-293 transfection reagent (Mirus  
207 #MIR 2704) according to manufacturer's protocol and incubated at 37°C with 5% (v/v)  $\text{CO}_2$  for 4 days.  
208 GFP fluorescence was first observed ~48 h post-transfection. Cells were harvested and spun in a clinical  
209 centrifuge at 700 rpm for 15 min at 4°C. Cell pellets were re-suspended in 500  $\mu\text{L}$  2x lysis buffer consisting  
210 of 1/10 volume 10% (v/v) Triton X-100, 1/20 volume 1 M ammonium sulfate adjusted to pH 9.0, and 1:500  
211 dilution of Pierce Universal Nuclease for Cell Lysis (Thermo Scientific #88700) in phosphate buffered  
212 saline (PBS).

#### 213 **4.3 | Immunofluorescence and confocal microscopy**

214 Confocal microscopy was performed as previously described<sup>20</sup>. HEK 293TT cells were grown until 25%  
215 confluent on no. 1.5 Gold Seal coverglass coverslips (Erie Scientific, Portsmouth, NH, USA) in each well  
216 of a 6-well plate (Corning, Kennebunk, ME, USA) in complete DMEM without hygromycin. Cells were  
217 transfected with plasmids (Genscript, Piscataway, NJ, USA) containing a GFP-expressing reporter gene  
218 using Mirus TransIT-293 transfection reagent (Mirus Bio, Madison, WI, USA) and incubated at 37°C with  
219 5% (v/v)  $\text{CO}_2$  for 4 days. Cells were fixed in Formalde-Fresh Solution (ThermoFisher) for 1h at RT and  
220 permeabilized with 70% (v/v) ethanol for 30 min at RT, rinsing between each step with PBS. Transfected  
221 cells were immunostained and incubated overnight at RT with a primary Ab solution containing 2  $\mu\text{g}/\text{mL}$   
222 of either anti-HPV16 L1 mouse monoclonal IgG<sub>2a</sub> Ab CAMVIR-1 (Santa Cruz Biotechnology, Dallas, TX)  
223 or anti-DENV hMAb 1.6D<sup>20</sup> in 0.1% (v/v) Tween20 (Sigma-Aldrich, St. Louis, MO), 5% (w/v) non-fat dry  
224 milk, and PBS. Secondary Ab solution consisting of 2  $\mu\text{g}/\text{mL}$  Alexa Fluor 594-conjugated goat anti-mouse  
225 or goat anti-human IgG (H+L) (Invitrogen, Carlsbad, CA) in 0.1% Tween20 and PBS was added and  
226 incubated overnight at RT. Nuclei were counterstained with 0.5  $\mu\text{g}/\text{mL}$  Hoechst (Cambrex, Walkersville,  
227 MD) for 15 min at RT followed by a final rinse step. Fluoromount-G (Southern Biotech, Birmingham, AL)  
228 was used to mount coverslips onto Fisherbrand Superfrost microscope slides (Fisher Scientific, Pittsburgh,  
229 PA). Images were obtained using an Olympus FV1000 Confocal Microscope System.

#### 230 **4.4 | Maturation and purification of VLPs**

231 Cell lysate was matured by 18-24 hours incubation in a 37°C water bath and clarified by incubation for 10  
232 min on ice followed by the addition of 0.17 volumes of 5M NaCl (85 $\mu\text{L}$ /500 $\mu\text{L}$  lysate). This solution was  
233 spun at 5,000 xg for 10 min at 4°C to pellet debris. The supernatant was transferred to a new 1.5mL tube  
234 and spun again.

#### 235 **4.5 | Ultracentrifugation of VLPs**

236 Rate-zonal density gradients were prepared using 60% Optiprep (Sigma #D1556-250ML). 10% and 30%  
237 solutions were prepared in Dulbecco's phosphate-buffered saline (DPBS)/0.8M NaCl. Gradients were  
238 created using inclined rotation (Gradient Mate, BioComp) in ultracentrifuge tubes (Beckman #349622).  
239 125 $\mu\text{L}$  of clarified lysate was added to the top of each gradient tube. Tubes were then spun in an SW50  
240 rotor at 45,000 RPM for 30 min at 20°C. Nine fractions (~525 $\mu\text{L}$  each) were collected from the bottom of  
241 each tube using a Beckman Fraction Recovery System.

#### 242 **4.5 | HPV L1 SDS-PAGE and Western blots**

243 2-20% precast gels (Biorad) were used for running SDS-PAGE. Samples were prepared by diluting 1:1 in  
244 Laemmli buffer with DTT and boiling for 10 minutes. Before loading onto the gel, samples were spun for  
245 1 minute at 10,000 RPM in an Eppendorf microfuge. Gels were run at 100V for 1 hour and 15 minutes in  
246 Tris-Glycine-SDS running buffer. Proteins were transferred to a PVDF membrane at 0.3 amps for 1  
247 h 15 min. The membrane was blocked with PBS-T + 3% BSA for 1h at room temperature. Primary  
248 anti-HPV 16 L1 antibody (CAMVIR-1, Santa Cruz Biotechnology, Dallas, TX) was added to the  
249 membrane diluted 1:500 in PBS-T + 3% BSA and incubated overnight at 4°C. The membrane  
250 was then washed for 30 min with PBS-T, followed by secondary antibody (Alexafluor 488 goat  
251 anti-mouse) diluted 1:500 in PBS-T at room temperature for 3 h 30 min. The membrane was  
252 washed again with PBS-T for 30 min at RT, then dried overnight before scanning.

#### 253 **4.6 | DENV FL enzyme linked immunoassay**

254 Corning brand high-bind 96-well plates (ThermoFisher, Waltham, MA) were coated with 100  $\mu$ L/well of  
255 antigen, either L1-WT VLP or L1-cysFL VLP. Plates were incubated at 4°C for 48 h, equilibrated to  
256 room temperature, then rinsed 6x with wash buffer containing 0.5% (v/v) Tween20 (Sigma) in PBS.  
257 Wells were blocked with 200  $\mu$ L blocking buffer containing 5% (w/v) non-fat dry milk and 0.5% (v/v)  
258 Tween20 in PBS, incubated at RT for 1 h, and rinsed 6x with wash buffer. Varying concentrations of  
259 primary anti-DENV FL HMAb 1.6D (REFS 19, 20 Costin, Schieffelin) were prepared in wash buffer, 100  
260  $\mu$ L/well was added and incubated at RT for 1 h 30 min, then rinsed 6x with wash buffer warmed to 37°C.  
261 Secondary peroxidase-conjugated affinity purified goat anti-human IgG (Pierce, Rockford, IL, USA) was  
262 diluted to 2  $\mu$ g/mL in wash buffer, 100  $\mu$ L/well was added and incubated covered at RT for 1 h. After a  
263 final 37°C wash step, color was developed with tetramethylbenzidine peroxide (ProMega, Madison, WI).  
264 The reaction was stopped after 3 min by adding 1M phosphoric acid (Sigma, Saint Louis, MO), and the  
265 absorbance was read at 450 nm.

#### 266 **4.7 | Electron microscopy**

267 The VLP fraction collected by ultracentrifugation was desalted by centrifugal filter (Centriprep 30K,  
268 Millipore Sigma) to remove Optiprep. 0.5  $\mu$ L of the desalted VLP fraction was air dried onto a 300 mesh  
269 Carbon Type B copper grid (Ted Pella, Redding CA), for approximately 10 minutes, then stained with 0.5  
270  $\mu$ L 2% uranyl acetate solution for 60 s. Excess stain was blotted away gently. Images were collected using  
271 a JEOL 2011 TEM with an accelerating voltage of 200 kV. Images were taken at a nominal magnification  
272 of 100,000x.

#### 273 **SUPPLEMENTARY MATERIALS**

275 The following are provided for additional depth. Supplementary Figure 1. Multiple sequence alignment and  
276 phylogram for 23 mutually diverse primate papilloma virus L1 sequences, showing sites of high variability.  
277 Supplementary Figure 2. An illustration of greek-key, jelly roll protein folding pathway and assembly of  
278 the capsomeres and VLPs, showing loop intercalation. Supplementary Figure 3. Blow-up image of the  
279 modeled cysFL insertion, near the 5-fold axis of the capsomere. Supplementary Figure 4. Relative staining  
280 of HPVL1-WT and HPVL1-FL by conformational antibodies to the FL. Supplementary Figure 5. Wild-  
281 type HPVL1 tetramer. Supplementary Figure 6. HPVL1-cysFL tetramer. Supplementary Video 1.  
282 Molecular dynamics simulation of the wild-type HPVL1 tetramer. Supplementary Video 2. Molecular  
283 dynamics simulation of the HPVL1-cysFL tetrameric state.

#### 284 **ACKNOWLEDGEMENTS**

286 The Authors declare that there is no conflict of interest. This work was supported by NIH  
287 R01GM099827-01A1 to CB and SFM. We would like to express our thanks to John Schiller for helpful  
288 discussions and the HPV L1 expression system.

#### 289 **AUTHOR CONTRIBUTIONS**

291 Danielle A. Basore: Data curation; investigation; methodology; validation; visualization; writing-original  
292 draft; writing-review and editing.

293 Carolyn M. Barcellona: Data curation; investigation; methodology; validation; visualization; writing-  
294 original draft; writing-review and editing.

295 Thomas B. Jordan: Data curation; investigation; methodology; validation; visualization; writing-review  
296 and editing.

297 Donna E. Crone: Methodology; validation; writing-review and editing.

298 Christopher Bystroff: Conceptualization; data curation; investigation; methodology; project  
299 administration; validation; visualization; writing-original draft; writing-review and editing.

300 Scott F. Michael: Conceptualization; data curation; methodology; project administration;  
301 validation; visualization; writing-original draft; writing-review and editing

302

303

304 **FIGURE 1** (a) Design of 558-residue HPV16-L1 chimeras with inserted 58-residue DENV FL sequences  
305 inserted into the DE loop, replacing Ala-Asn (red). The cysFL insert contains flanking CGP/GPC motif for  
306 improved stability (green), while FL has a single Gly. Native disulfide-forming cysteines are shaded (cyan,  
307 intramolecular; yellow, intermolecular) (b) Modeled structure of chimeric HPV16 L1 monomer and  
308 capsomere, based on crystal structures of HPV11-L1 (PDBid:2R5K) and DENV2 E-protein  
309 (PDBid:3C5X), showing the FL or cysFL in black.  
310  
311

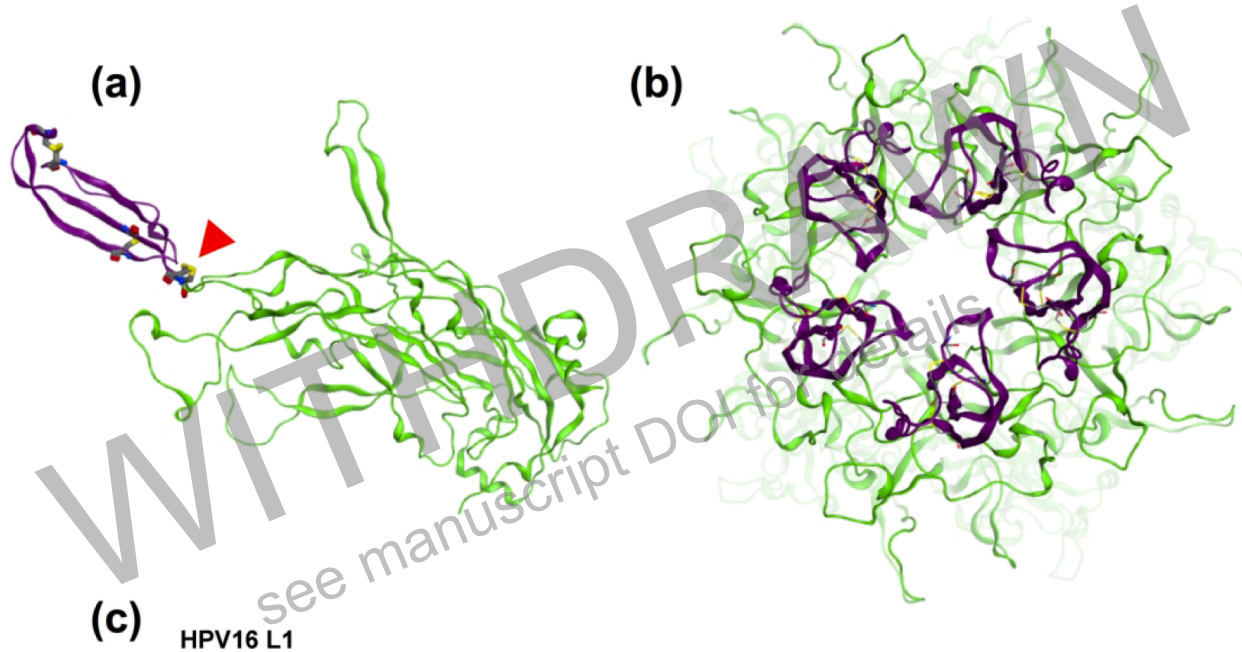

```
MSLWLPSEATVYLPPVPVSKVSTDEYVARTNIYYHAGTSRLLAVGHPYFPIKKNPNNK
ILVPKVSGLQYRVFRIHLDPNKFPGFDPDTSFYNPDTQRLVWACVGVGVGRGQPLGVGIS
GHPLLNLKDDTENASAYAANAGVDNRECISMDYKQTQLCLIGCKPPIGEHWGKGSPTN
VAVNPGDCPPELINTVIQDGMVDTGFGAMDFTTLQANKSEVPLDICTSICKYPDYIK
MVSEPYGDSLFFYLRRQMFVRHLFNRAQTVGENVPDDLYIKGSGSTANLASSNYFPTP
SGSMVTSDAQIFNKPYWLQRAQGHNGICWGNQLFVTVDTRSTNMSLCAAISTSETT
YKNTNFKEYLRHGEEDLQFIFQLCKITLTADVMTYIHSMNSTILEDWNFGLQPPPGGT
LEDTYRFVTSQAIACQKHTPPAPKEDPLKKYTFWEVNLKEKFSADLDQFPLGRKFLLQA
GLKAKPKFTLGKRRKATPTTSSTSTAKRRKRKL
```

#### DENV inserts

##### FL

```
SIITNTTDSRCPTQGEPTLNEEQDQNFVCKHTMVDRGWGNGCGLFGKGGIVTCAMFC
```

##### cysFL

```
CGPNTTTESRCPTQGEPTLNEEQDKRFVCKHSMVDRGWGNGCGLFGKGGIVTCAGPC
```

312  
313

314 **FIGURE 2** Expression of chimeric proteins in transfected cells. Western blot of relative expression levels  
315 of wild type HPV16 L1 and the two chimeric constructs with a consensus DENV FL and with a DENV2  
316 FL and a cysteine disulfide lock (cysFL). The L1 protein is detected using an anti-L1 mouse monoclonal  
317 Ab. Untransfected cell lysate is run as a negative control. 50 and 75 kD size standards are indicated. WT  
318 L1 is expressed at a higher level than either chimera. The chimeric L1 proteins are slightly larger than the  
319 WT protein.

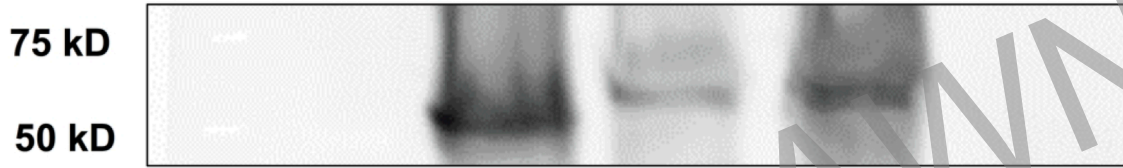

320  
321

WITHDRAWN  
see manuscript DOI for details



322 **FIGURE 3** Immunofluorescence microscopy of transfected cells (400X magnification). L1 protein (red) is  
323 detected using an anti-L1 mouse monoclonal Ab. GFP (green) is co-expressed from the transfected plasmid.  
324 Nuclei are counterstained blue. Untransfected cells are shown as a negative control.

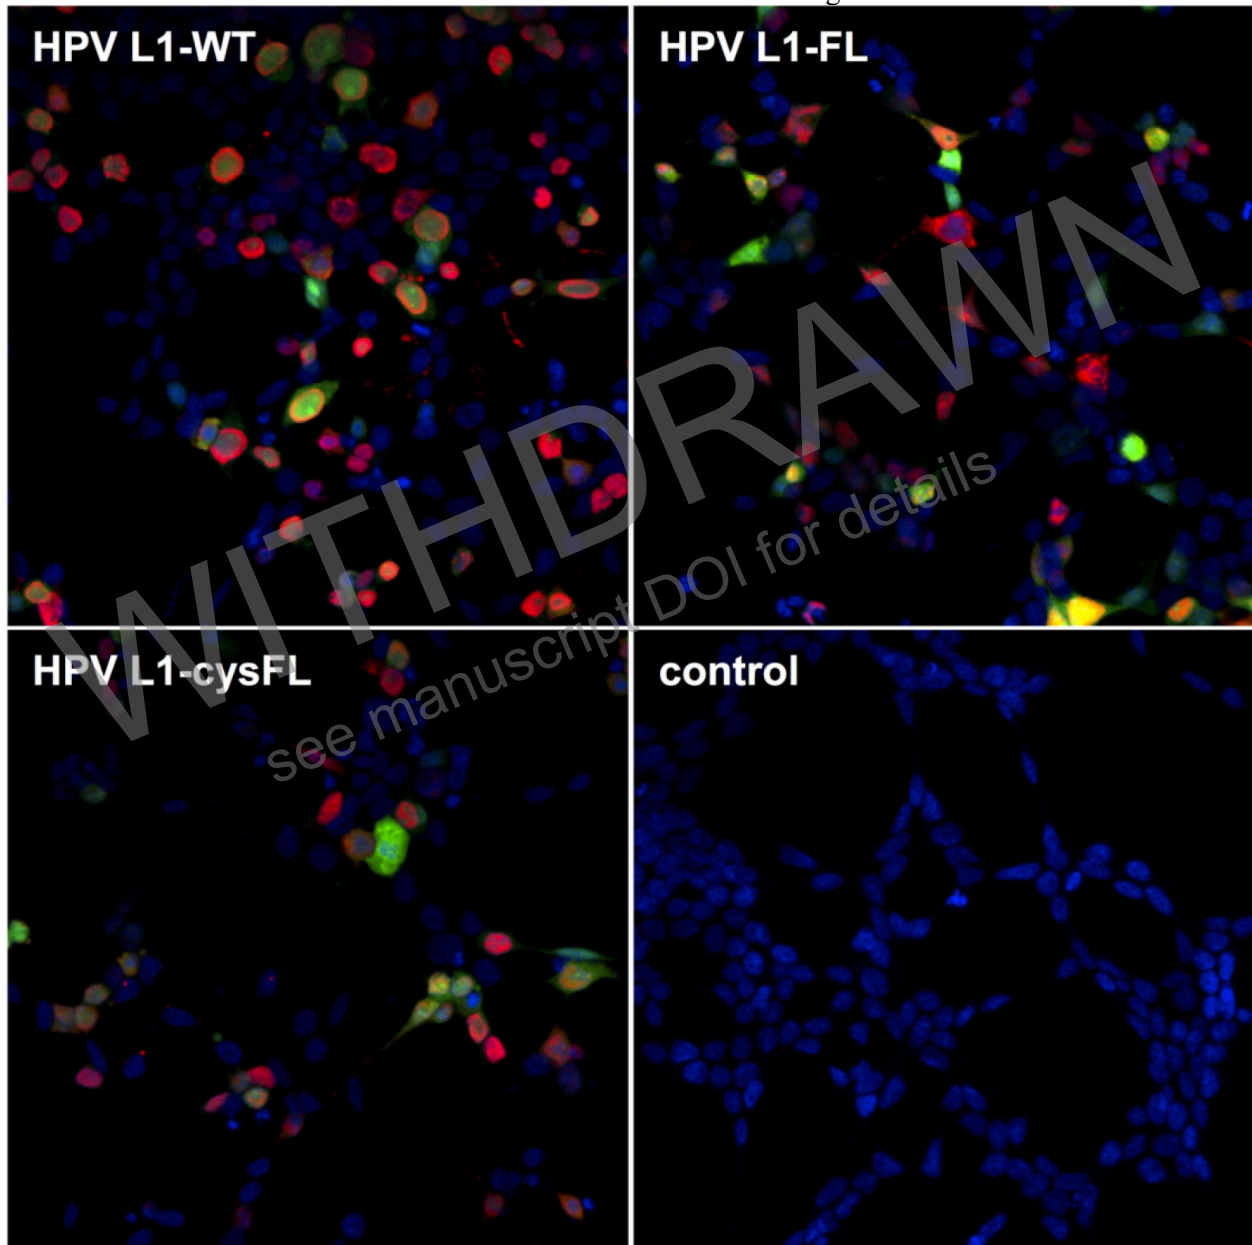

325  
326

327 **FIGURE 4** Assembly of chimeric virus like particles. Western blots of fractions from rate zonal  
328 centrifugation of matured, transfected cell lysates. WT L1, the consensus FL and the DENV2 FL with the  
329 disulfide (cysFL) were compared. Additionally, matured lysates from cell transfected with a 9:1 ratio of  
330 chimeric to WT L1 were compared to evaluate the ability of WT L1 to rescue assembly of chimeras. The  
331 L1 protein is detected using an anti-L1 mouse monoclonal Ab. 50 kD size standards are indicated.  
332 Assembled VLPs migrate into the center fractions. The chimeric L1 proteins are slightly larger than the  
333 WT L1 protein.

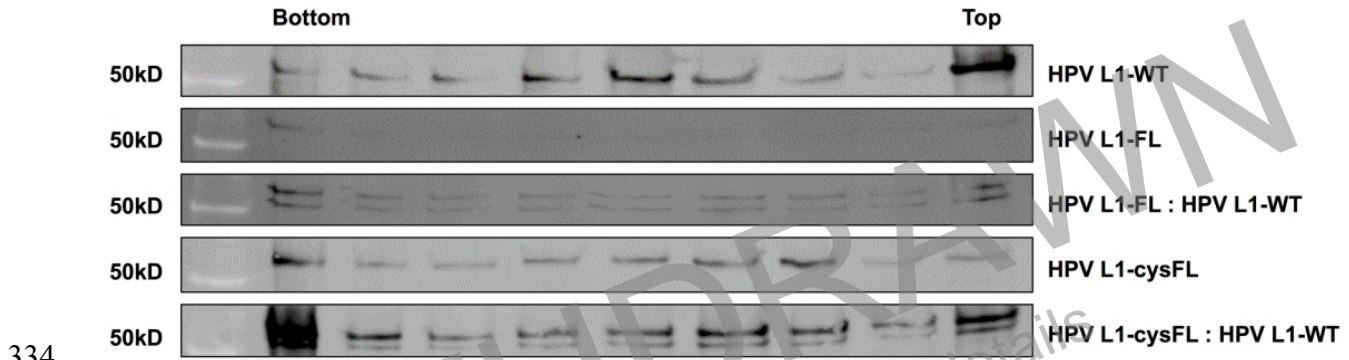

334  
335

336 **FIGURE 5** Transmission Electron Micrograph images of (a) assembled HPV16 L1-WT, (b) HPV16 L1-  
337 cysFL and (c) HPV18 L1-WT. Samples were air dried onto grid and stained with uranyl acetate. 50 nm  
338 scale bars are shown.

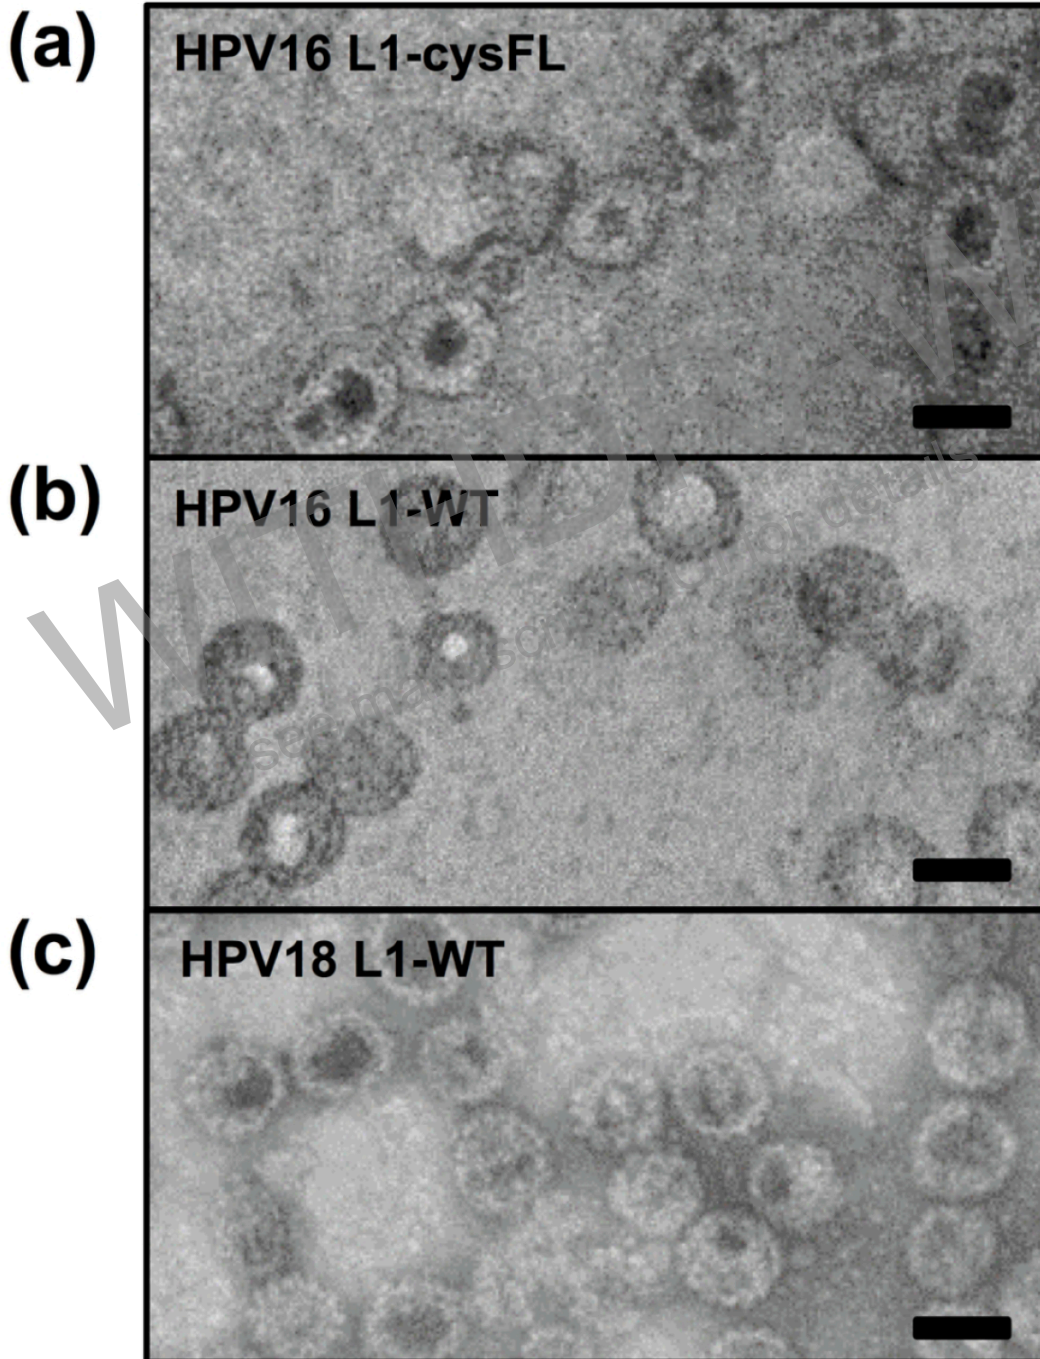

339  
340

341 **FIGURE 6** The DENV FL can be detected on assembled VLPs using a conformationally-sensitive human  
342 monoclonal Ab. Equalized quantities of assembled WT L1 and cysteine locked FL L1 VLPs were probed  
343 by ELISA using a conformationally-sensitive human monoclonal Ab against the fusion loop. This Ab  
344 specifically detected the FL containing chimeric VLPs, but did not react with the WT L1 VLPs.

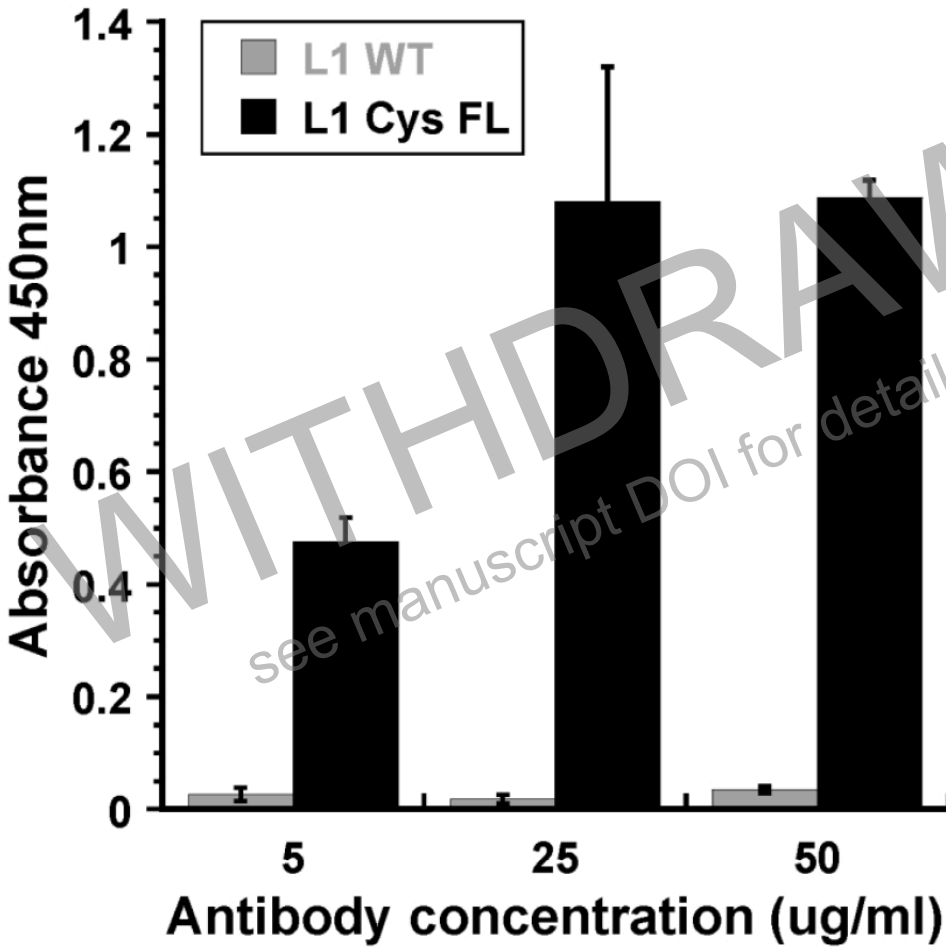

345  
346

347 **REFERENCES**

- 348 1. Denis J, Majeau N, Acosta-Ramirez E, Savard C, Bedard M-C, Simard S, Lecours K, Bolduc  
349 M, Pare C, Willems B, et al. (2007) Immunogenicity of papaya mosaic virus-like particles fused  
350 to a hepatitis C virus epitope: Evidence for the critical function of multimerization. *Virology*  
351 [Internet] 363:59–68. Available from:  
352 <https://www.sciencedirect.com/science/article/pii/S004268220700027X>
- 353 2. Miura K, Stone WJR, Koolen KM, Deng B, Zhou L, van Gemert G-J, Locke E, Morin M,  
354 Bousema T, Sauerwein RW, et al. (2016) An inter-laboratory comparison of standard membrane-  
355 feeding assays for evaluation of malaria transmission-blocking vaccines. *Malar. J.* [Internet]  
356 15:463. Available from: [http://malariajournal.biomedcentral.com/articles/10.1186/s12936-016-](http://malariajournal.biomedcentral.com/articles/10.1186/s12936-016-1515-z)  
357 [1515-z](http://malariajournal.biomedcentral.com/articles/10.1186/s12936-016-1515-z)
- 358 3. Seitz H, Danthony T, Burkart F, Ottonello S, Müller M (2013) Influence of oxidation and  
359 multimerization on the immunogenicity of a thioredoxin-12 prophylactic papillomavirus vaccine.  
360 *Clin. Vaccine Immunol.* [Internet] 20:1061–9. Available from:  
361 <http://www.ncbi.nlm.nih.gov/pubmed/23677323>
- 362 4. Yan M, Peng J, Jabbar IA, Liu X, Filgueira L, Frazer IH, Thomas R (2005) Activation of  
363 dendritic cells by human papillomavirus-like particles through TLR4 and NF- $\kappa$ B-mediated  
364 signalling, moderated by TGF- $\beta$ . *Immunol. Cell Biol.* [Internet] 83:83–91. Available from:  
365 <https://onlinelibrary.wiley.com/doi/10.1111/j.1440-1711.2004.01291.x>
- 366 5. Yu SS, Lau CM, Thomas SN, Jerome WG, Maron DJ, Dickerson JH, Hubbell JA, Giorgio TD  
367 (2012) Size- and charge-dependent non-specific uptake of PEGylated nanoparticles by  
368 macrophages. *Int. J. Nanomedicine* [Internet] 7:799. Available from:  
369 <http://www.ncbi.nlm.nih.gov/pubmed/22359457>
- 370 6. Victora GD, Nussenzweig MC (2012) Germinal Centers. *Annu. Rev. Immunol.* [Internet]  
371 30:429–457. Available from: [https://www.annualreviews.org/doi/10.1146/annurev-immunol-](https://www.annualreviews.org/doi/10.1146/annurev-immunol-020711-075032)  
372 [020711-075032](https://www.annualreviews.org/doi/10.1146/annurev-immunol-020711-075032)
- 373 7. Schiller JT, Lowy DR (1996) Papillomavirus-like particles and HPV vaccine development.  
374 *Semin. Cancer Biol.* [Internet] 7:373–382. Available from:  
375 <https://www.sciencedirect.com/science/article/abs/pii/S1044579X96900462>
- 376 8. Stanley M (2008) Immunobiology of HPV and HPV vaccines. *Gynecol. Oncol.* [Internet]  
377 109:S15–S21. Available from:  
378 [https://www.sciencedirect.com/science/article/pii/S0090825808001054?casa\\_token=eBt7UXG8](https://www.sciencedirect.com/science/article/pii/S0090825808001054?casa_token=eBt7UXG8qbQAAAAA:x4OVjWKwDiTUMGEPjv9Q4e3yoirjv5NM5nHBdSCZNpDp66KJk Wu68perYIIq6OYZ0gxzwJfjEA)  
379 [qbQAAAAA:x4OVjWKwDiTUMGEPjv9Q4e3yoirjv5NM5nHBdSCZNpDp66KJk Wu68perYII](https://www.sciencedirect.com/science/article/pii/S0090825808001054?casa_token=eBt7UXG8qbQAAAAA:x4OVjWKwDiTUMGEPjv9Q4e3yoirjv5NM5nHBdSCZNpDp66KJk Wu68perYIIq6OYZ0gxzwJfjEA)  
380 [q6OYZ0gxzwJfjEA](https://www.sciencedirect.com/science/article/pii/S0090825808001054?casa_token=eBt7UXG8qbQAAAAA:x4OVjWKwDiTUMGEPjv9Q4e3yoirjv5NM5nHBdSCZNpDp66KJk Wu68perYIIq6OYZ0gxzwJfjEA)
- 381 9. McLemore MR (2006) Gardasil®: Introducing the New Human Papillomavirus Vaccine. *Clin.*  
382 *J. Oncol. Nurs.* [Internet] 10:559–560. Available from: [http://cjon.ons.org/cjon/10/5/gardasil®-](http://cjon.ons.org/cjon/10/5/gardasil-introducing-new-human-papillomavirus-vaccine)  
383 [introducing-new-human-papillomavirus-vaccine](http://cjon.ons.org/cjon/10/5/gardasil-introducing-new-human-papillomavirus-vaccine)
- 384 10. Schellenbacher C, Roden R, Kirnbauer R (2009) Chimeric L1-L2 virus-like particles as  
385 potential broad-spectrum human papillomavirus vaccines. *J. Virol.* [Internet] 83:10085–95.  
386 Available from: <http://www.ncbi.nlm.nih.gov/pubmed/19640991>
- 387 11. Skolnick J, Kolinski A (1990) Dynamic Monte Carlo simulations of globular protein  
388 folding/unfolding pathways: I. Six-member, Greek key  $\beta$ -barrel proteins. *J. Mol. Biol.* [Internet]  
389 212:787–817. Available from:  
390 <https://www.sciencedirect.com/science/article/pii/002228369090237G>
- 391 12. Capaldi AP, Ferguson SJ, Radford SE (1999) The greek key protein apo-pseudoazurin folds  
392 through an obligate on-pathway intermediate. *J. Mol. Biol.* [Internet] 286:1621–1632. Available  
393 from:

- 394 [https://www.sciencedirect.com/science/article/pii/S0022283698925888?casa\\_token=FNz9e-](https://www.sciencedirect.com/science/article/pii/S0022283698925888?casa_token=FNz9e-)  
395 [KI2vkAAAAA:uEJmPvoA\\_ceR1DDhqzQ-o0RomNa6rOOUv-gnOrDgnpk73s2DBovOpCdr-](https://www.sciencedirect.com/science/article/pii/S0022283698925888?casa_token=FNz9e-KI2vkAAAAA:uEJmPvoA_ceR1DDhqzQ-o0RomNa6rOOUv-gnOrDgnpk73s2DBovOpCdr-)  
396 [yTWA0nRPe4NuGX55A](https://www.sciencedirect.com/science/article/pii/S0022283698925888?casa_token=FNz9e-yTWA0nRPe4NuGX55A)
- 397 13. Bork P, Holm L, Sander C (1994) The Immunoglobulin Fold: Structural Classification,  
398 Sequence Patterns and Common Core. *J. Mol. Biol.* [Internet] 242:309–320. Available from:  
399 <https://www.sciencedirect.com/science/article/pii/S0022283684715828>
- 400 14. Efimov A V. (1997) Structural trees for protein superfamilies. *Proteins Struct. Funct. Genet.*  
401 [Internet] 28:241–260. Available from: [https://onlinelibrary.wiley.com/doi/10.1002/\(SICI\)1097-](https://onlinelibrary.wiley.com/doi/10.1002/(SICI)1097-)  
402 [0134\(199706\)28:2%3C241::AID-PROT12%3E3.0.CO;2-I](https://onlinelibrary.wiley.com/doi/10.1002/(SICI)1097-0134(199706)28:2%3C241::AID-PROT12%3E3.0.CO;2-I)
- 403 15. Schellenbacher C, Roden R, Kirnbauer R (2009) Chimeric L1-L2 Virus-Like Particles as  
404 Potential Broad-Spectrum Human Papillomavirus Vaccines. *J. Virol.* 83:10085–10095.
- 405 16. Palatnik-de-Sousa CB, Soares I da S, Rosa DS (2018) Editorial: Epitope Discovery and  
406 Synthetic Vaccine Design. *Front. Immunol.* [Internet] 9:826. Available from:  
407 <http://journal.frontiersin.org/article/10.3389/fimmu.2018.00826/full>
- 408 17. Bente DA, Rico-Hesse R (2006) Models of dengue virus infection. *Drug Discov. Today Dis.*  
409 *Model.* [Internet] 3:97–103. Available from:  
410 [https://www.sciencedirect.com/science/article/pii/S1740675706000156?casa\\_token=ZKr3Hzk8F](https://www.sciencedirect.com/science/article/pii/S1740675706000156?casa_token=ZKr3Hzk8F)  
411 [kQAAAAA:eYGAZpjibV5oFlImq0Hhry9IYvrn39DtcAq5gjOpc717HVqqJbZnsBbF9\\_c0NChns](https://www.sciencedirect.com/science/article/pii/S1740675706000156?casa_token=ZKr3Hzk8FkQAAAAA:eYGAZpjibV5oFlImq0Hhry9IYvrn39DtcAq5gjOpc717HVqqJbZnsBbF9_c0NChns)  
412 [n-m1kH-3g](https://www.sciencedirect.com/science/article/pii/S1740675706000156?casa_token=ZKr3Hzk8Fn-m1kH-3g)
- 413 18. Bhatt S, Gething PW, Brady OJ, Messina JP, Farlow AW, Moyes CL, Drake JM, Brownstein  
414 JS, Hoen AG, Sankoh O, et al. (2013) The global distribution and burden of dengue. *Nature*  
415 [Internet] 496:504–507. Available from: <http://www.nature.com/articles/nature12060>
- 416 19. Halstead SB (2017) Dengvaxia sensitizes seronegatives to vaccine enhanced disease  
417 regardless of age. *Vaccine* [Internet] 35:6355–6358. Available from:  
418 [https://www.sciencedirect.com/science/article/pii/S0264410X17313610?casa\\_token=k22wjlk97](https://www.sciencedirect.com/science/article/pii/S0264410X17313610?casa_token=k22wjlk97)  
419 [nMAAAAA:ZSnG6bqGED1NSfAgghgxF7G2\\_pHBbRNgXaUHR4aaEIV38WP-](https://www.sciencedirect.com/science/article/pii/S0264410X17313610?casa_token=k22wjlk97nMAAAAA:ZSnG6bqGED1NSfAgghgxF7G2_pHBbRNgXaUHR4aaEIV38WP-)  
420 [25pxWInVQ0B9SgsE63ot-iBbBw](https://www.sciencedirect.com/science/article/pii/S0264410X17313610?casa_token=k22wjlk9725pxWInVQ0B9SgsE63ot-iBbBw)
- 421 20. Costin JM, Zaitseva E, Kahle KM, Nicholson CO, Rowe DK, Graham AS, Bazzone LE,  
422 Hogancamp G, Figueroa Sierra M, Fong RH, et al. (2013) Mechanistic Study of Broadly  
423 Neutralizing Human Monoclonal Antibodies against Dengue Virus That Target the Fusion Loop.  
424 *J. Virol.* [Internet] 87:52–66. Available from: <https://journals.asm.org/doi/10.1128/JVI.02273-12>
- 425 21. Schieffelin JS, Costin JM, Nicholson CO, Orgeron NM, Fontaine KA, Isern S, Michael SF,  
426 Robinson JE (2010) Neutralizing and non-neutralizing monoclonal antibodies against dengue  
427 virus E protein derived from a naturally infected patient. *Virol. J.* [Internet] 7:28. Available from:  
428 <https://virologyj.biomedcentral.com/articles/10.1186/1743-422X-7-28>
- 429 22. Huang CY-H, Butrapet S, Moss KJ, Childers T, Erb SM, Calvert AE, Silengo SJ, Kinney  
430 RM, Blair CD, Roehrig JT (2010) The dengue virus type 2 envelope protein fusion peptide is  
431 essential for membrane fusion. *Virology* [Internet] 396:305–315. Available from:  
432 <https://www.sciencedirect.com/science/article/pii/S0042682209006515>
- 433 23. Lu Z, Murray KS, Cleave V Van, LaVallie ER, Stahl ML, McCoy JM (1995) Expression of  
434 Thioredoxin Random Peptide Libraries on the Escherichia coli Cell Surface as Functional  
435 Fusions to Flagellin: A System Designed for Exploring Protein-Protein Interactions. *Nat.*  
436 *Biotechnol.* [Internet] 13:366–372. Available from:  
437 <http://www.nature.com/doifinder/10.1038/nbt0495-366>
- 438 24. Matsumura M, Signor G, Nature BM-, 1989 undefined Substantial increase of protein  
439 stability by multiple disulphide bonds. *nature.com* [Internet]. Available from:

440 [https://idp.nature.com/authorize/casa?redirect\\_uri=https://www.nature.com/articles/342291a0&c](https://idp.nature.com/authorize/casa?redirect_uri=https://www.nature.com/articles/342291a0&c)  
441 [asa\\_token=4OdqHpl8xjAAAAAA:6D6gz33cPKKqgTNjY2NHlq5Ls\\_BcJhhai3dDwxzV37xIKC](https://www.nature.com/articles/342291a0&casa_token=4OdqHpl8xjAAAAAA:6D6gz33cPKKqgTNjY2NHlq5Ls_BcJhhai3dDwxzV37xIKC)  
442 [DJVhA3dILUuq-0wMImX4pFe9Ck9mKY4LwJ](https://www.nature.com/articles/342291a0&casa_token=4OdqHpl8xjAAAAAA:6D6gz33cPKKqgTNjY2NHlq5Ls_BcJhhai3dDwxzV37xIKC)  
443 25. Fersht AR (2000) Transition-state structure as a unifying basis in protein-folding  
444 mechanisms: contact order, chain topology, stability, and the extended nucleus mechanism. Proc.  
445 Natl. Acad. Sci. U. S. A. [Internet] 97:1525–9. Available from:  
446 <http://www.ncbi.nlm.nih.gov/pubmed/10677494>  
447 26. Okonechnikov K, Golosova O, Fursov M (2012) Unipro UGENE: a unified bioinformatics  
448 toolkit. Bioinformatics [Internet] 28:1166–1167. Available from:  
449 <https://academic.oup.com/bioinformatics/article-lookup/doi/10.1093/bioinformatics/bts091>  
450 27. Edgar RC (2004) MUSCLE: multiple sequence alignment with high accuracy and high  
451 throughput. Nucleic Acids Res. [Internet] 32:1792–7. Available from:  
452 <http://www.ncbi.nlm.nih.gov/pubmed/15034147>  
453 28. Buck CB, Pastrana D V., Lowy DR, Schiller JT Generation of HPV Pseudovirions Using  
454 Transfection and Their Use in Neutralization Assays. In: Human Papillomaviruses. New Jersey:  
455 Humana Press; 2005. pp. 445–462. Available from: [http://link.springer.com/10.1385/1-59259-](http://link.springer.com/10.1385/1-59259-982-6:445)  
456 [982-6:445](http://link.springer.com/10.1385/1-59259-982-6:445)  
457  
458

WITHDRAWN  
see manuscript DOI for details
